# Supplementary material
Source: publisher figshare collection journal article supplement (https://gsajournals.figshare.com/ndownloader/files/17429036)
Supplement: Supplementary file 1 [file 17429036]

## Sheet: Updated LOP&assoc genes May27
Table S3. Optic lobe LOP-expressing lines and associated genes (FlyBase 6.10)
NP line	Inserted in gene:	Upstream (w/in 2kbp):	Downstream (w/in 2kbp):
22	ush		CR46258
125	neur, hyx
158	CG17574, CR45140		bic
188		blw	CycB
224		Xpd	Pu
269	grp	CG31807, CG33552
297	CG32174, frc		CG32176, CG12229
302	mod	krz
369		Mcr, CR45257	Bsg
408	CG7860		CG15643
563	mir-2498	qsm, mir-310, mir-311, mir-312	mir-991, mir-992, Nnf1a
584	CG13564	CG10339	CG16786
646	olf186-F		olf186-M
659		trol, mir-4955
672	nudC	CG9674	CG13024
675	lola
680	kis
840	CG18605	Topors
902	vimar, CG30156		CG17002
1093	CR43836
1094	pico
1162	sprt
1377	CG30022		sprt
2664	qsm		mir-310, mir-311, mir-312, mir-313, mir-2498
2683
			kbp = kilbase pairs
Total	Total	Total	Total
25	24	16	21
	Total number of genes associated with LOP-expressing Gal4 lines: 61

## Sheet: Updated LOP genes May16
NP line	Insertion Site	Proximal genes
22	2L:488,625	cbt	ush	MED15
125	3R:9,039,399	hyx					bold or highlight small number of lines with RFP at third instar
158	2R:12,868,700	CG17574
188	2R:22,803,149	CycB	blw	stl
224	2R:21,175,295	Pu	Xpd	CG4286
269	2L:16,685,230	grp
297	3L:17,433,166	frc
302	3R:32,052,656	mod
369	2L:8,083,282	Bsg	Mcr
408	X:15,569,162	CG7860
563	2R:20,584,457	bl	l(2)05510
584		CG13564
646		olf-F
659		trol	Pdfr
672		CG9674	nudC	CG13024
675		lola
680		kis
840		CG18605
902		vimar
1093		CG10962
1094		pico
1162		Sprite	CG7759
1377		sprt
2664		qsm
2683		CG2811	CG2811	Tina-1
25 NP lines		25	9	5
		Total associated genes: 39 genes
Removed:
607
3360

## Sheet: Sheet1
Candidate genes						NP	checked CJE
cbt	ush	MED15	FBgn0043364	FBgn0003963	FBgn0027592	22	yes
hyx			FBgn0037657			125	yes
CG17574			FBgn0033777			158	yes
CycB	blw	stl	FBgn0000405	FBgn0011211	FBgn0086408	188	yes
Pu	Xpd	CG4286	FBgn0003162	FBgn0015844	FBgn0034601	224	yes
grp			FBgn0011598			269	yes
frc			FBgn0042641			297	yes
mod			FBgn0002780			302	yes
Bsg	Mcr		FBgn0261822	FBgn0020240		369	yes
CG7860			FBgn0030653			408	yes
bl	l(2)05510		FBgn0015907	FBgn0028622		563	yes
CG13564			FBgn0034973			584	yes
Nc73EF			FBgn0010352			607	yes
olf-F			FBgn0041585			646	yes
trol	Pdfr		FBgn0261451	FBgn0260753		659	yes
CG9674	nudC	CG13024	FBgn0036663	FBgn0021768	FBgn0036665	672	yes
lola			FBgn0005630			675	yes
kis			FBgn0086902			680	yes
CG18605			FBgn0034411			840	yes
vimar			FBgn0022960			902	yes
CG10962			FBgn0030073			1093	yes
pico			FBgn0261811			1094	yes
Sprite	CG7759		FBgn0082585	FBgn0033633		1162	yes
sprt			FBgn0082585			1377	yes
qsm			FBgn0028622			2664	yes
CG2811	CG2811	Tina-1	FBgn0035082	FBgn0035082	FBgn0035083	2683	yes
CG4050	mago	Magi	FBgn0020312	FBgn0002736	FBgn0034590	3360	yes

## Sheet: Sheet2
NP line	Insertion Site	Proximal genes
22	2L:488,625	cbt	ush	MED15
125	3R:9,039,399	hyx					bold or highlight small number of lines with RFP at third instar
158	2R:12,868,700	CG17574
188	2R:22,803,149	CycB	blw	stl
224	2R:21,175,295	Pu	Xpd	CG4286
269	2L:16,685,230	grp
297	3L:17,433,166	frc
302	3R:32,052,656	mod
369	2L:8,083,282	Bsg	Mcr
408	X:15,569,162	CG7860
563	2R:20,584,457	bl	l(2)05510
584		CG13564
607		Nc73EF
646		olf-F
659		trol	Pdfr
672		CG9674	nudC	CG13024
675		lola
680		kis
840		CG18605
902		vimar
1093		CG10962
1094		pico
1162		Sprite	CG7759
1377		sprt
2664		qsm
2683		CG2811	CG2811	Tina-1
3360		CG4050	mago	Magi
